# Supplementary material for: Exon-Level Transcriptome Profiling in Murine Breast Cancer Reveals Splicing Changes Specific to Tumors with Different Metastatic Abilities
Source: PLOS journal article supplement (doi:10.1371/journal.pone.0011981), 2010-08-06

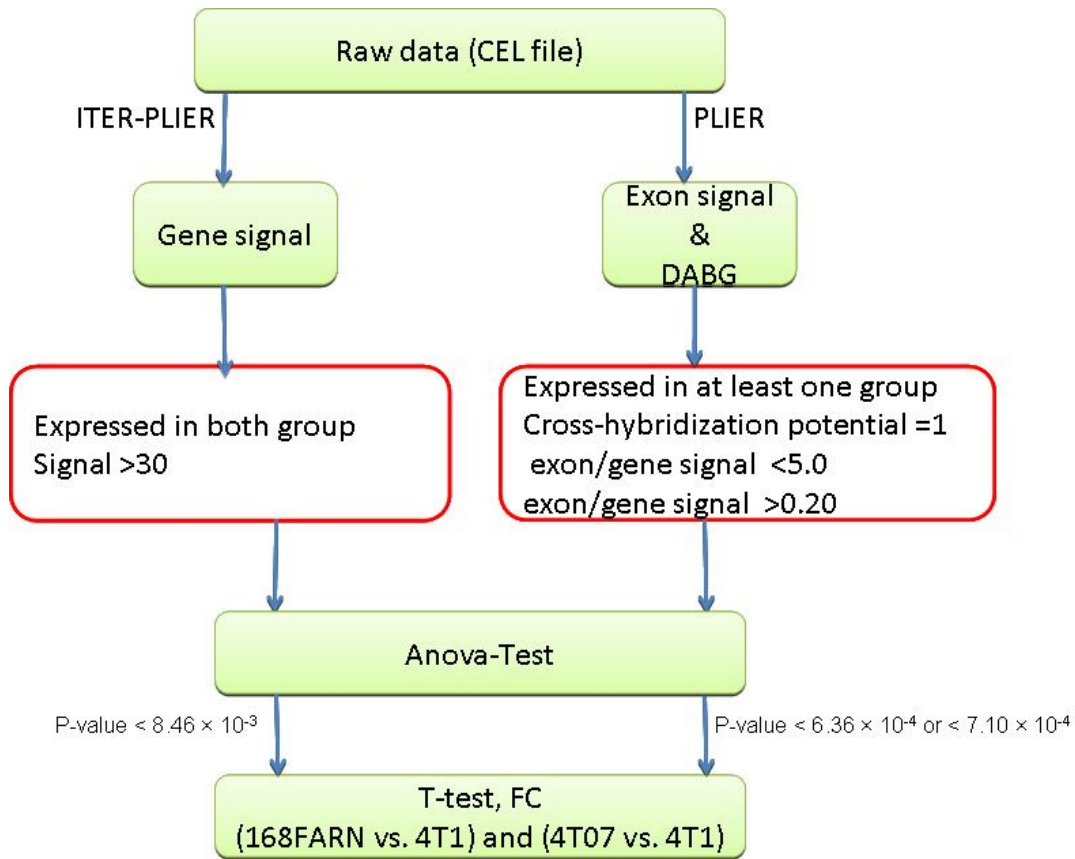

Supplement: S6 (10.1371/journal.pone.0011981.s006) [file journal.pone.0011981.s006]
